# Supplementary material for: Structural insights into the molecular mechanism of mouse TRPA1 activation and inhibition
Source: PubMed Central journal article supplement — J Gen Physiol. 2018 May 7;150(5):751–62. doi: 10.1085/jgp.201711876 (PMC5940248; doi:10.1085/jgp.201711876), 2018-05-07
Supplement: JGP_201711876_sm.pdf [file JGP_201711876_sm.pdf]

Supplemental material

Samanta et al., <https://doi.org/10.1085/jgp.201711876>

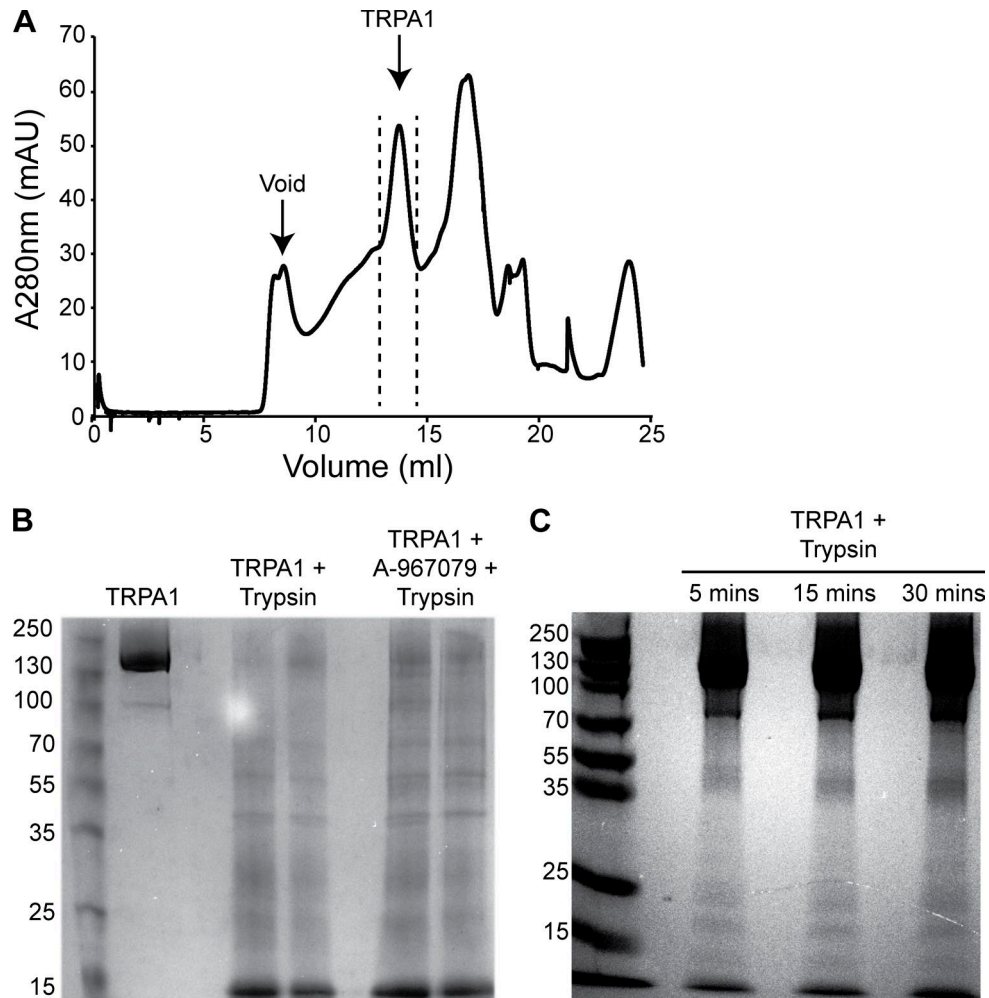

Figure S1. **TRPA1 purification and limited proteolysis of pure TRPA1.** (A) Gel filtration profile of purified mouse TRPA1; the peak corresponding to tetrameric, amphipol-stabilized TRPA1 is shown by the dotted lines. (B) Coomassie-stained SDS-PAGE gel showing purified TRPA1, purified TRPA1 cleaved with trypsin for 15 min, and purified TRPA1 treated with A-967079 for 10 min and then cleaved with trypsin for 15 min. (C) Coomassie-stained SDS-PAGE gel showing time course of trypsinization of purified TRPA1.

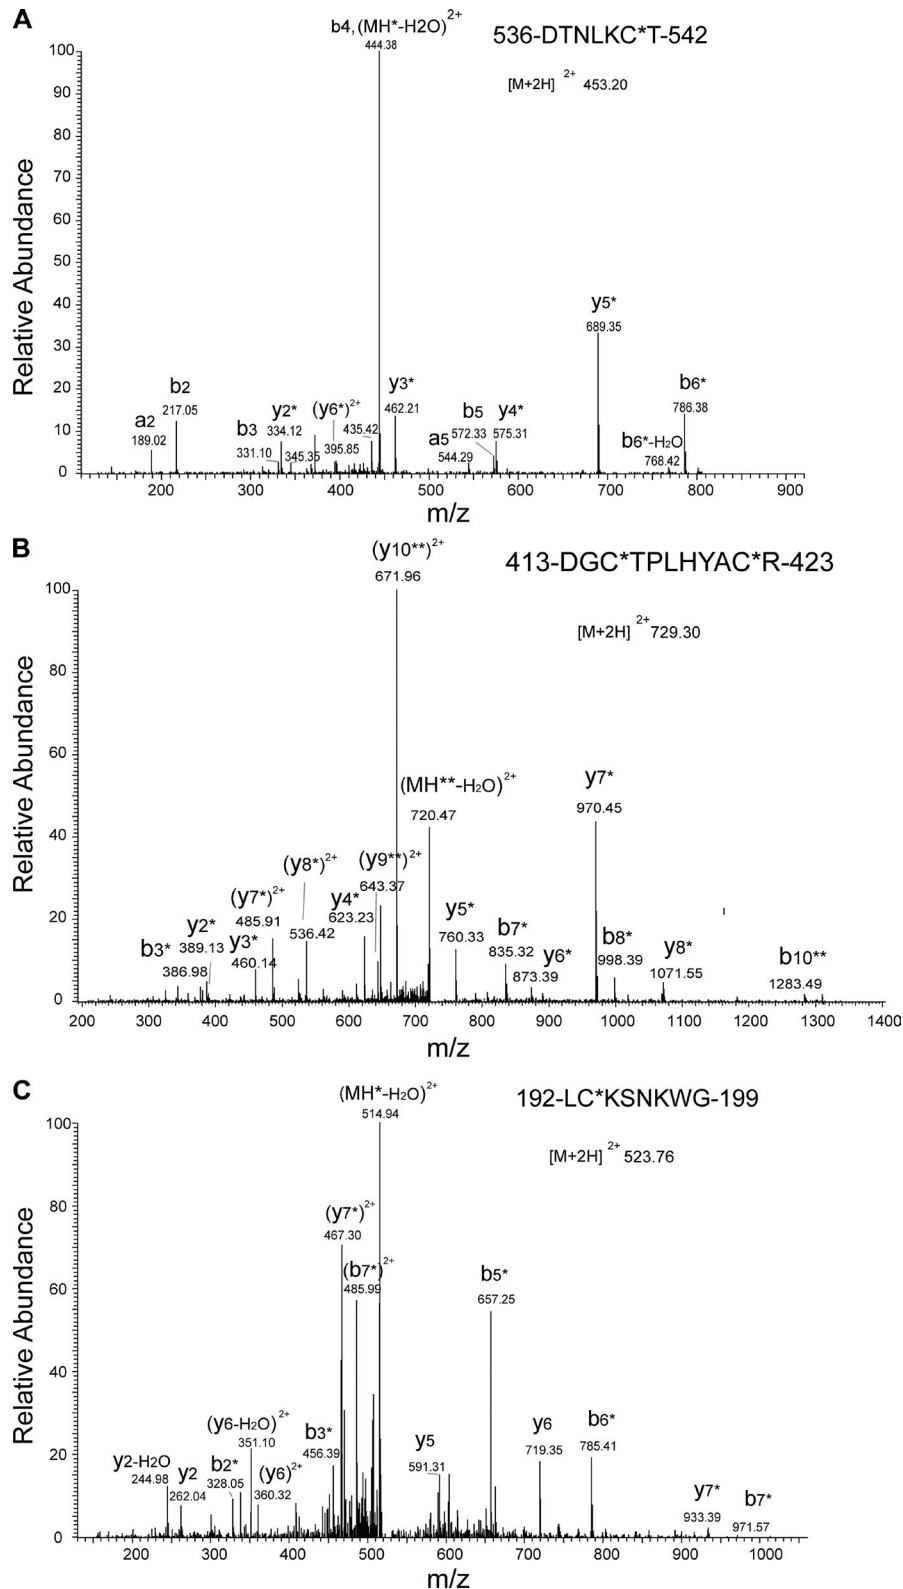

Figure S2. **Nano-LC-MS/MS spectrum of the modified peptides after Asp-N digestion of NMM-activated TRPA1.** (A) MS/MS spectrum of the doubly protonated ion ( $m/z$  453.20) of the 536–542 peptide has mass shift of 111.032 D at Cys-540 residues corresponding to cysteine modification by NMM. The  $y^*$ - and  $b^*$ -fragment ions correspond to the  $y$ - and  $b$ -fragment ions that were modified by NMM. (B) MS/MS spectrum of the doubly protonated ion ( $m/z$  729.30) of the 413–423 peptide has mass shift of 222.064 D that corresponds to modification by NMM at both Cys-415 and Cys-422 residues. The  $y^*$ ,  $b^*$ - and  $y^{**}$ ,  $b^{**}$ -fragment ions correspond to the  $y$ - and  $b$ -fragment ions that were modified by one and two molecules of NMM, respectively. (C) MS/MS spectrum of the doubly protonated ion ( $m/z$  523.76) of the 192–199 peptide has mass shift of 111.032 D at Cys-193 residues corresponding to cysteine modification by NMM. The  $y^*$ - and  $b^*$ -fragment ions correspond to the  $y$ - and  $b$ -fragment ions that were modified by NMM.

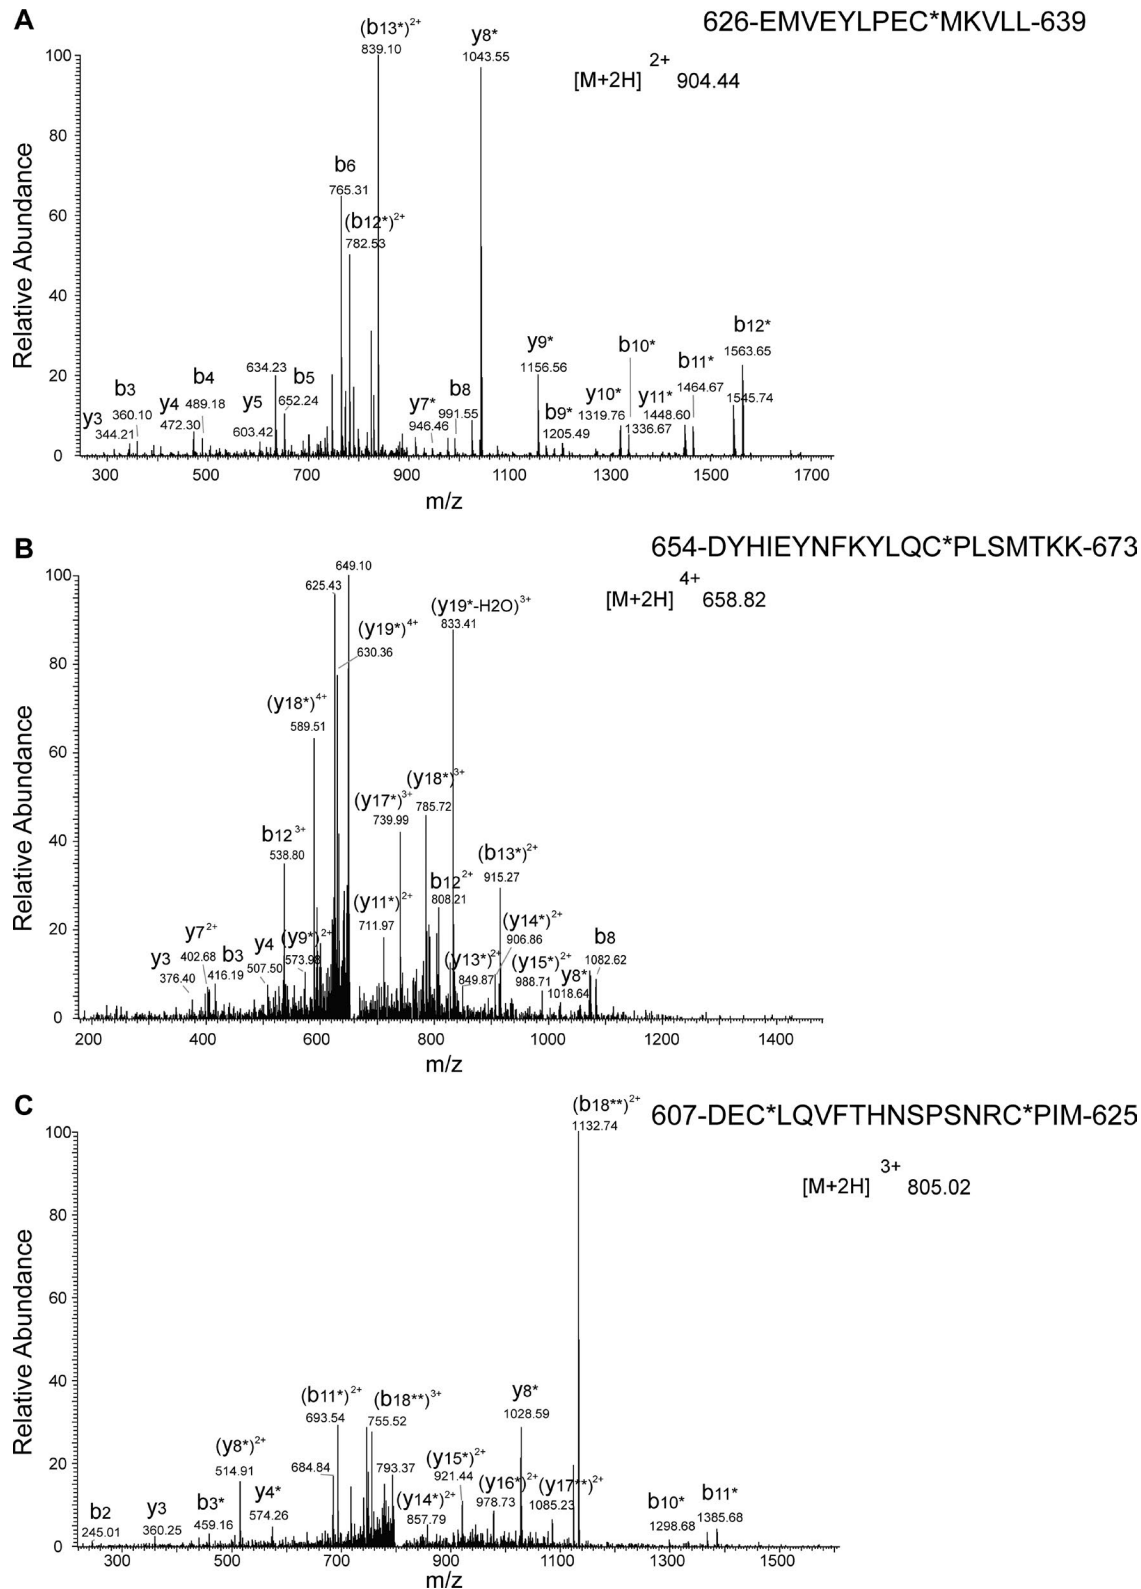

Figure S3. **Nano-LC-MS/MS spectrum of the modified peptides after Asp-N digestion of NMM-activated TRPA1.** (A) MS/MS spectrum of the doubly protonated ion (m/z 904.44) of the 626–639 peptide has mass shift of 111.032 D at Cys-634 residues corresponding to cysteine modification by NMM. The y<sup>\*</sup>- and b<sup>\*</sup>-fragment ions correspond to the y- and b-fragment ions that were modified by NMM. (B) MS/MS spectrum of the quadruply protonated ion (m/z 658.82) of the 654–673 peptide has a mass shift of 111.032 D at Cys-666 residues corresponding to cysteine modification by NMM. The y<sup>\*</sup>- and b<sup>\*</sup>-fragment ions correspond to the y- and b-fragment ions that were modified by NMM. (C) MS/MS spectrum of the triply protonated ion (m/z 805.02) of the 607–625 peptide has mass shift of 222.064 D that corresponds to modification by NMM at both Cys-609 and Cys-622 residues. The y<sup>\*</sup>, b<sup>\*</sup>- and y<sup>\*\*</sup>, b<sup>\*\*</sup>-fragment ions correspond to the y- and b-fragment ions that were modified by one and two molecules of NMM, respectively.
